RESEARCH ARTICLE

# Lactate Dehydrogenase B Is Associated with the Response to Neoadjuvant Chemotherapy in Oral Squamous Cell Carcinoma

Wenyi Sun<sup>1</sup>, Xiaomin Zhang<sup>2</sup>, Xu Ding<sup>2</sup>, Huaiqi Li<sup>2</sup>, Meiyu Geng<sup>1</sup>, Zuoquan Xie<sup>1\*</sup>, Heming Wu<sup>2\*</sup>, Min Huang<sup>1\*</sup>

**1** Division of Antitumor Pharmacology, State Key Laboratory of Drug Research, Shanghai Institute of Materia Medica, Chinese Academy of Sciences, Shanghai, China, **2** Jiangsu Key Laboratory of Oral Diseases, Department of Oral and Maxillofacial Surgery, Affiliated Hospital of Stomatology, Nanjing Medical University, Nanjing, China

\* [mhuang@simm.ac.cn](mailto:mhuang@simm.ac.cn) (MH); [whmz2002@aliyun.com](mailto:whmz2002@aliyun.com) (HW); [zqxie@simm.ac.cn](mailto:zqxie@simm.ac.cn) (ZX)

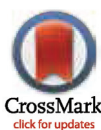

**OPEN ACCESS**

**Citation:** Sun W, Zhang X, Ding X, Li H, Geng M, Xie Z, et al. (2015) Lactate Dehydrogenase B Is Associated with the Response to Neoadjuvant Chemotherapy in Oral Squamous Cell Carcinoma. PLoS ONE 10(5): e0125976. doi:10.1371/journal.pone.0125976

**Academic Editor:** A R M Ruhul Amin, Winship Cancer Institute of Emory University, UNITED STATES

**Received:** January 22, 2015

**Accepted:** March 27, 2015

**Published:** May 14, 2015

**Copyright:** © 2015 Sun et al. This is an open access article distributed under the terms of the [Creative Commons Attribution License](https://creativecommons.org/licenses/by/4.0/), which permits unrestricted use, distribution, and reproduction in any medium, provided the original author and source are credited.

**Data Availability Statement:** All relevant data are within the paper and its Supporting Information files.

**Funding:** This work was supported by the National Natural Science Foundation of China (No. 81222049, No. 81202549), the National Science and Technology Major Project of the Ministry of Science and Technology of China (No. 2012ZX09301001-004, No. 2012ZX09301001-007) and the Pujiang Scholar Program Grant by the Shanghai Metropolitan Government (No. 12PJ1410400).

## Abstract

Oral squamous cell carcinoma (OSCC) comprises a subset of head and neck squamous cell carcinoma (HNSCC) with poor therapeutic outcomes and high glycolytic dependency. Neoadjuvant chemotherapy regimens of docetaxel, cisplatin and 5-fluorouracil (TPF) are currently accepted as standard regimens for HNSCC patients with a high risk of distant metastatic spread. However, the antitumor outcomes of TPF neoadjuvant chemotherapy in HNSCC remain controversial. This study investigated the role of lactate dehydrogenase B (LDHB), a key glycolytic enzyme catalyzing the inter-conversion between pyruvate and lactate, in determining chemotherapy response and prognosis in OSCC patients. We discovered that a high protein level of LDHB in OSCC patients was associated with a poor response to TPF regimen chemotherapy as well as poor overall survival and disease-free survival. Our in-depth study revealed that high LDHB expression conferred resistance to taxol but not 5-fluorouracil or cisplatin. LDHB deletion sensitized OSCC cell lines to taxol, whereas the introduction of LDHB decreased sensitivity to taxol treatment. Taxol induced a pronounced impact on LDHB-down-regulated OSCC cells in terms of apoptosis, G2/M phase cell cycle arrest and energy metabolism. In conclusion, our study highlighted the critical role of LDHB in OSCC and proposed that LDHB could be used as a biomarker for the stratification of patients for TPF neoadjuvant chemotherapy and the determination of prognosis in OSCC patients.

## Introduction

Oral squamous cell carcinoma (OSCC) is a subset of head and neck squamous cell carcinoma (HNSCC) that has a poor therapeutic outcome and a 5-year survival rate of 50%–60% [1, 2]. Despite advances in multidisciplinary treatment modalities, no improvement in the 5-year survival rate has been achieved over the past 20 years [3]. Recently, neoadjuvant chemotherapy has emerged as an effective way to reduce locally advanced or aggressive cancers to improve

**Competing Interests:** The authors have declared that no competing interests exist.

the chance of eradicating locoregional lesions by radical surgery and/or radiation in HNSCC patients. Several randomized trials have discovered that a neoadjuvant chemotherapy regimen of docetaxel, cisplatin and 5-fluorouracil (TPF) improved overall survival and progression-free survival in HNSCC patients [4–7]. Indeed, TPF has been accepted as a standard regimen for HNSCC patients with a high risk of distant metastasis; nonetheless, it was noted that TPF failed to demonstrate a survival advantage in the overall study population [8]. In addition, a meta-analysis showed that neoadjuvant chemotherapy decreased the rate of distant metastasis but did not improve the survival of HNSCC patients [9]. These discrepancies raise the possibility that TPF neoadjuvant chemotherapy might improve antitumor outcomes in a molecularly defined subset of patients. As such, the identification of well-defined molecular signatures is essential for decreasing the risk of surgery delay in patients with chemotherapy-resistant tumors.

OSCC is known as a type of highly hypoxic cancer, which may suggest its unique metabolic profile of glycolytic dependency. In cancer cells with high aerobic glycolysis, glucose is preferentially converted into lactic acid, known as the "Warburg effect" [10], and lactate dehydrogenase (LDH) plays an essential role by catalyzing the formation of lactic acid from pyruvate. In fact, it has been shown that the overexpression of LDH conferred glycolytic dependency in some tumor subtypes. LDH is a tetrameric enzyme composed of two major subunits, A and/or B, resulting in five isozymes: A4 (LDH-5), A3B1 (LDH-4), A2B2 (LDH-3), A1B3 (LDH-2) and B4 (LDH-1). LDHA, the predominant subunit in skeletal muscle, catalyzes the conversion of pyruvate into lactate, whereas LDHB, mainly expresses in heart muscle, favors the conversion of lactate into pyruvate [11]. The role of LDHA in cancer malignancy has been intensively studied to date. LDHA is elevated and activated in many cancers [12–15] and is believed to play a crucial role in tumor initiation [16], maintenance and progression [17]. LDHA is transcriptionally regulated by the onco-genes c-MYC [18] and Hif-1 [19] or directly phosphorylated by the tyrosine kinase FGFR1 to promote aerobic glycolysis [20]. The inhibition of LDHA leads to oxidative stress and subsequent mitochondrion-dependent apoptosis in cancer cells [21, 22].

However, the significance of LDHB in tumor progression and therapeutic outcomes remains elusive and not well characterized. An increasing number of studies have shown that LDHB might play a critical role in some subtypes of cancers. LDHB expression was found to correlate with both KRAS genomic copy number gains and KRAS mutations in lung cancer, which might explain why KRAS-mutant lung tumors are highly dependent on glycolysis for proliferation [23]. In basal-like or triple-negative breast cancer, LDHB was highly expressed and associated with poor outcomes [24]. Furthermore, the level of LDHB predicted a pathologically complete response to anthracycline-based neoadjuvant chemotherapy in both HR-positive/HER2-negative and triple-negative breast cancers [25]. These findings suggest a critical role of LDHB in a subset of human cancers.

In this study, we investigated the role of LDHB in determining the response to chemotherapy in OSCC. We discovered that a high level of LDHB expression was correlated with a low response to TPF neoadjuvant chemotherapy, which was possibly due to compromised sensitivity to taxol treatment. High LDHB expression was also closely associated with poor overall survival and disease-free survival in OSCC. These observations supported LDHB as a predictive marker for the response to TPF neoadjuvant chemotherapy in patients with OSCC and as a prognostic marker for OSCC.

## Materials and Methods

### Patient samples

Human paraffin-embedded tissue samples were collected from 107 patients (61 males and 46 females) who were examined and treated for primary OSCC at the Stomatological Hospital of

Nanjing Medical University, Nanjing, China, from Jan 2005 to Dec 2008. Written informed consent from these patients was obtained for the use of their tissue samples and for follow-up interviews for the research. The tumor grade was classified as poorly differentiated, moderately differentiated, and well differentiated, and the pathological stage was defined according to the American Joint Committee on Cancer (AJCC) TNM staging system. Primary tumor sites included the tongue (n = 40), gingiva (n = 22), buccal mucosa (n = 30), mouth floor (n = 3), palate (n = 7), and jaw (n = 5). Follow-up data were collected through direct interviews with the patients or their relatives. From Jan 2010 to Jun 2014, another set of 50 patients with locally advanced resectable OSCC (stage III or IVA) underwent two cycles of TPF induction chemotherapy (75 mg/m<sup>2</sup> of docetaxel on day 1, 75 mg/m<sup>2</sup> of cisplatin on day 1, and 750 mg/m<sup>2</sup> of fluorouracil on day 1 to day 5), and the tumor response to induction chemotherapy was assessed according to RECIST (version 1.0) by standard evaluation and CT/MRI imaging studies prior to radical resection [8]. A favorable response was defined as a complete or partial response (sensitive); an unfavorable response was defined as a stable or progressive disease (resistant).

## Ethics Statement

The study was conducted in accordance with the guidelines of the Declaration of Helsinki. The ethical review board (Committee of Ethics of Nanjing Medical University) approved the use of human paraffin-embedded tissues.

## Immunohistochemistry

LDHB expression was determined by immunohistochemical staining using an LDHB antibody (Rabbit polyclonal, Cat No: ab75167, Abcam, MA, USA) diluted 1:100, according to the manufacturer's instructions. Negative controls consisted of tissue sections were incubated with normal mouse serum or phosphate-buffered saline (PBS). All of the sections were counterstained with hematoxylin. LDHB expression was evaluated semi-quantitatively as the total immunostaining score, which was calculated as the product of the proportion score and the intensity score. Briefly, the proportion score was defined as the fraction of positively stained cells: 1, <5%; 2, 5–10%; 3, 10–50%; 4, 50–75%; 5, >75% of cell stained. The staining intensity was evaluated as follows: 0, no staining signal; 1, weak positive signal; 2, moderate positive signal; 3, strong positive signal. Thus, the total expression score could range from 0 to 15. High LDHB expression was defined as a total expression score  $\geq 7$ . The evaluation was performed independently by two observers, and the average of two readings was used for the statistical analysis.

## Cell culture

Cal27 cells were obtained from American Type Culture Collection (MD, USA). Tca8113 and KB cells were bought from the China Center for Type Culture Collection (Hubei, China). HN4, HN6, HN12 and HN30 cells were provided by Shanghai Ninth Hospital of Shanghai Jiaotong University School of Medicine, generously donated by Dr. Silvio Gutkind on Dec. 2011 (NIH, MD, USA), and were used in previous studies [26–29]. The Cal27 and HN series cells were maintained in DMEM, KB cells in MEM and TCA8113 cells in RPMI-1640 supplemented with 10% fetal bovine serum (FBS) in a humidified incubator containing 5% CO<sub>2</sub> at 37°C. All of the culture media and FBS were purchased from Invitrogen (CA, USA).

## siRNA transfection

siRNA oligonucleotides for LDHA and LDHB were synthesized by Raybiotech (Guangdong, China), with a scrambled siRNA used as a control. Transfection was performed using

Lipofectamine RNAiMAX (Life Technologies, IL, USA) according to the manufacturer's protocol. Whole-cell lysates were prepared for further analysis at 72 h post-transfection. The target sequences for LDHB were 5-CUGGAAACUAAGUGGAUUATT-3 and 5-CCCGUGUCAACAAUGGUAATT-3, and the target sequences for LDHA were 5-GGAGAAAGCCGUCUUAUU-3 and 5-GGCAAAGACUAUAAUGUAA-3.

### Western blot analysis

Cells were lysed with RIPA Buffer (25 mM Tris-HCl (pH 7.6), 150 mM NaCl, 1% NP-40 (v/v), 1% sodium deoxycholate (w/v), 0.1% SDS (w/v) and protease inhibitor cocktail), and the amount of total protein was determined with a BCA protein assay kit (Beyotime, Jiangsu, China). Equal amounts of protein (10  $\mu$ g) were separated by electrophoresis on a 10% (w/v) PAGE gel and transferred to an Immun-Blot PVDF membrane (Bio-Rad, CA, USA). The membranes were blocked in 3% (w/v) BSA in Tris-buffered saline/Tween 20 buffer and then immunoblotted with the corresponding antibodies (diluted in 1:1000) obtained as follows: LDHA (Rabbit polyclonal, Cat No: ab47010), LDHB (Rabbit polyclonal, Cat No: ab75167), and GAPDH (Rabbit monoclonal, Cat No: ab181602) from Abcam (MA, USA), bcl-2 (Rabbit monoclonal, Cat No: #4223S), caspase-3 (Rabbit monoclonal, Cat No: #9665), and caspase-7 (Rabbit monoclonal, Cat No: #12827) from CST (MA, USA), cytochrome C (Mouse monoclonal, Cat No: AC909) from Beyotime (Jiangsu, China). The primary antibodies were visualized with HRP-conjugated secondary antibodies using Western Lightning-ECL (Millipore, MA, USA).

### ATP assay

Intracellular ATP levels were assessed using an ATP assay kit (BioVision, CA, USA). Cells were lysed in 200  $\mu$ L of lysis buffer and centrifuged at 12,000  $\times g$  to collect the supernatant. An aliquot (100  $\mu$ L) of ATP detection working solution was added to each well of a black 96-well culture plate (Corning, MA, USA), and the plate was incubated for 5 min at room temperature. Then, 10  $\mu$ L of the cell lysate was added to the wells, and the luminescence was measured immediately. The data were normalized to the amount of protein content in each sample.

### Oxygen consumption rate (OCR) and extracellular acidification rate (ECAR) analyses

The XF96 extracellular flux analyzer (Seahorse Biosciences, MA, USA) was used to measure oxygen consumption, expressed in pmol/min, and the extracellular acidification rate, expressed in mpH/min. Cells were seeded in XF96 cell culture plates at a density of 8000 cells/well. After attachment, compounds were added and incubated for 24 h. The cells were equilibrated with bicarbonate-free buffered DMEM at 37°C for 1 h without CO<sub>2</sub> immediately before the XF assay. Each XF96 assay well was equipped with a disposable sensor cartridge and embedded with 96 pairs of fluorescent biosensors (oxygen and pH) coupled to fiber-optic waveguides that delivered light rays at various excitation wavelengths (oxygen = 532 nm, pH = 470 nm) and transmitted a fluorescent signal (oxygen = 650 nm, pH = 530 nm) to a set of highly sensitive photodetectors.

### Cell cycle analysis

Cell cycle distributions were determined by propidium iodide (PI, Sigma-Aldrich, MO, USA) staining. In brief,  $2 \times 10^5$  of cells in a 6-well culture dish were incubated with the indicated doses of taxol for 72 h. The cells were then washed twice with PBS and fixed in 70% (v/v) ethanol for

1 h. The cells were washed again with PBS and then incubated with PI (10 mg/mL) and RNase A at 37°C for 30 min. The cell cycle distributions were measured with a Flow Cytometer (Becton Dickinson, CA, USA) and analyzed using FlowJo software.

### Apoptosis assay

Apoptosis was measured by annexin V and PI staining using the Annexin V-FITC Apoptosis Detection Kit (Vazyme, Jiangsu, China), according to the manufacturer's protocol, and analyzed by flow cytometry.

### Cell viability assay

Cells were seeded at a density of  $3 \times 10^3$  per well in 100  $\mu$ L of culture medium in a 96-well plate. Shortly after attachment, the cells were treated with taxol at the indicated dose. After incubation for 72 h, a CCK8 assay was performed according to the manufacturer's protocol (Life Technologies, IL, USA).

### Mitochondrion-free cytoplasm preparation

Mitochondria were isolated from KB cells using Cell Mitochondria Isolation Kit (Beyotime, Jiangsu, China). Briefly, cells were collected, washed with PBS, and then suspended in ice-cold isolation buffer for 15 min. After the cells were homogenized, the homogenate was centrifuged at  $600 \times g$  for 10 min at 4°C, and the supernatant was then centrifuged at  $11,000 \times g$  for 10 min at 4°C. The mitochondria were collected in the pellet, and the supernatant was considered the cytosol without mitochondria.

### Mitochondrial cytochrome C assay

We used Millipore's FlowCollect Cytochrome C Kit (MA, USA) to assess the loss of mitochondrial cytochrome C in cells. Briefly, mitochondria were isolated and detected using an anti-Cytochrome C-FITC antibody and then analyzed and sorted by FACS analysis.

### Clonogenic Assay

Cells were seeded at a density of  $1 \times 10^2$  in a 6-well plate and treated with taxol at the indicated dosage. After 10 days of culture, the colonies were fixed with ethanol and stained with 0.05% crystal violet (Sigma-Aldrich, MO, USA).

### LDH activity assay

The LDH activity of cell lysates was examined using Lactate Dehydrogenase Activity Assay Kit according to the manufacturer's instructions (BioVision, CA, USA). In brief, cells were collected, washed and extracted to measure LDH activity. The results were normalized to the amount of total protein.

### Extracellular lactate measurement

Cells were cultured in serum-free medium and their extracellular lactate level was measured using a lactate assay kit (Beyotime, Jiangsu, China). The readouts were normalized by the corresponding protein amounts.

## Statistical analysis

Comparisons between groups were analyzed by a one-way ANOVA using statistical package SPSS (version 19.0; SPSS Inc., IL, USA), and *P* values less than 0.05 were considered statistically significant. The statistical significance of the difference between LDHB expression and TPF-induced chemotherapeutic efficacy was examined using cross-table and Chi-square analyses. The statistical significance of the difference between LDHB expression and pathological parameters was examined using a Chi-square analysis. Overall survival and disease-free survival were calculated by the Kaplan-Meier method and compared with the log-rank test.

## Results

### LDHB is associated with OSCC prognosis and response to chemotherapy

First, we examined the expression of LDHB in a total of 107 OSCC patient samples using immunohistochemical staining. The patients were then classified into LDHB low-expression and high-expression groups according to the proportion and intensity scores (Fig 1A). We observed that a high expression of LDHB was significantly associated with poor overall survival ( $P < 0.001$ ) and disease-free survival ( $P < 0.001$ ) (Fig 1B and 1C). Moreover, we compared the expression of LDHB with pathological parameters (Table 1) and found that LDHB expression was correlated with tumor recurrence ( $P = 0.011$ ) and closely correlated with tumor size ( $P = 0.090$ ), distant metastasis ( $P = 0.055$ ) and TNM classification ( $P = 0.079$ ) but was not significantly correlated with sex, age, histological grade or lymphatic metastasis. As LDHB is closely associated with a poor prognosis, to further examine its medical application, we analyzed the correlation between LDHB and the response to TPF neoadjuvant chemotherapy in a new set of OSCC patients. Intriguingly, we found a significant correlation between LDHB expression and the response to TPF neoadjuvant chemotherapy in OSCC patients ( $P = 0.014$ ) (Fig 1D). A high LDHB expression was correlated with an unfavorable response to TPF neoadjuvant chemotherapy, and the majority of patients in this group were resistant to therapy (14/26). Conversely, patients with low LDHB expression were more responsive to TPF neoadjuvant chemotherapy (21/24).

### The level of LDHB is correlated with OSCC cell sensitivity to taxol treatment

We examined the protein levels of LDHA and LDHB in seven OSCC cell lines. As shown in Fig 2A and 2B, the protein level of LDHB varied among different OSCC cell lines, whereas the LDHA level was very similar. We then probed the role of LDHB in OSCC progression by examining the impact of LDHB knockdown on the proliferation of these cell lines. Results showed that the growth inhibition varied in the range of 3.32% to 39.42% (S1 Fig), suggesting that the effect of LDHB knockdown on tumor progression might be dependent on its basal level in tumors. Next, we examined whether the LDHB level was correlated with the sensitivity to each component of TPF regimens, namely, taxol, cisplatin and 5-fluorouracil. Interestingly, we found that the level of LDHB in these cell lines was closely correlated with the efficacy of taxol (Fig 2C) but not 5-fluorouracil or cisplatin (Fig 2D and 2E). KB and HN12 cells, which possessed the highest abundance of LDHB, displayed the highest IC<sub>50</sub> values (7.09 nM and 6.24 nM, respectively), whereas HN4 and HN30, with the lowest expression of LDHB, displayed the highest sensitivity to taxol, with IC<sub>50</sub> values of 1.39 nM and 1.82 nM, respectively.

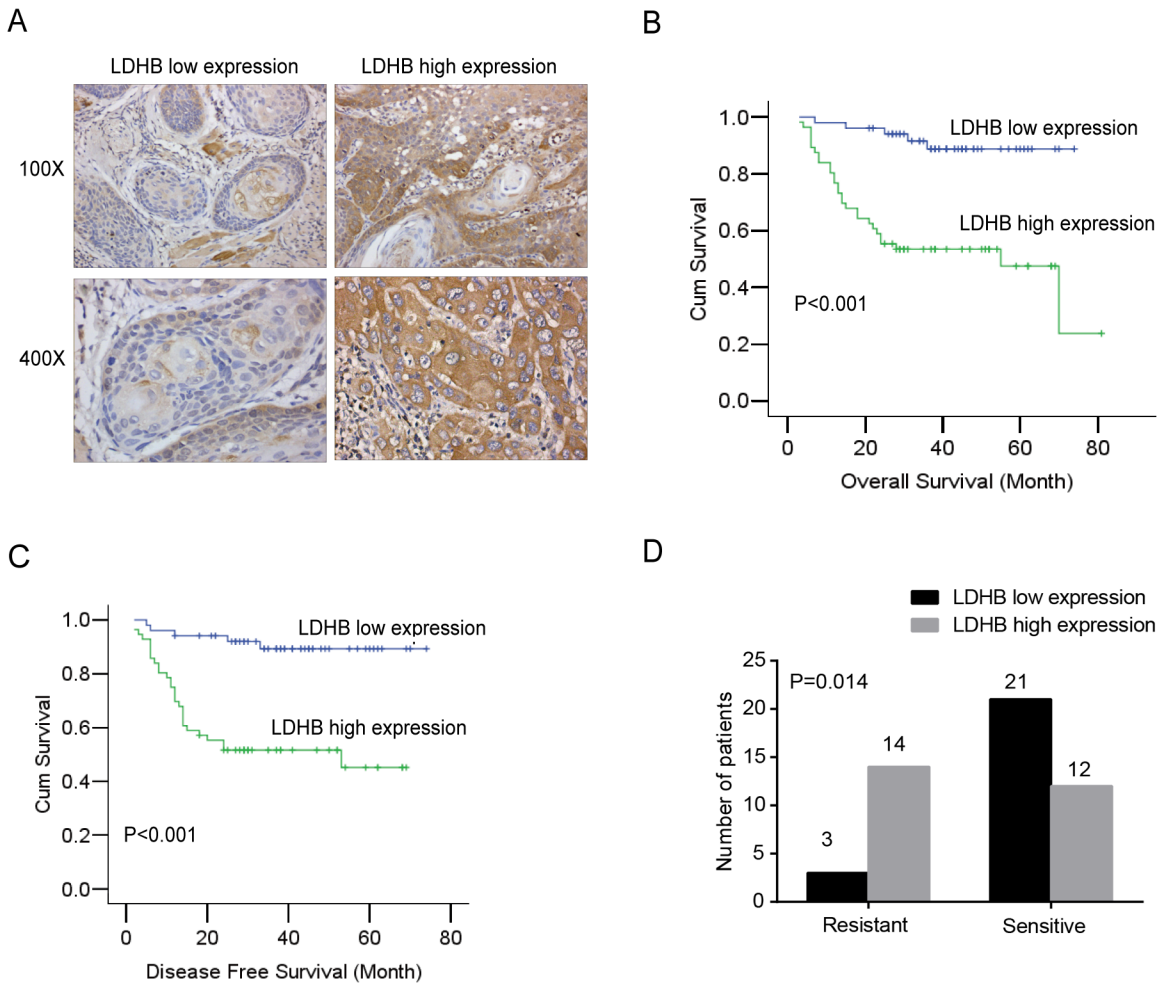

**Fig 1. LDHB is associated with prognosis and TPF induction chemotherapy in OSCC patients.** (A) Representative images of immunohistochemical staining for LDHB expression in OSCC patients. (B, C) The correlation of LDHB expression with overall survival and disease-free survival in OSCC patients (n = 107), as determined by Kaplan-Meier survival analysis. The P value was calculated using the log-rank test. (D) The correlation between LDHB expression and TPF induction chemotherapy efficacy in OSCC patients, as determined by cross-table analysis (n = 50).

doi:10.1371/journal.pone.0125976.g001

### LDHB affects the sensitivity of OSCC cells to taxol

The above results suggested that the level of LDHB might be a determinant of cell sensitivity to taxol. Therefore, we knocked down the expression of LDHB in KB and HN12 cells using siRNA. In consistent with the decrease of LDH activity, lactate level was markedly reduced by LDHB knockdown (Fig 3A and 3B), indicating that LDHB was the critical subtype of LDH that catalyzed the conversion of pyruvate into lactate in these cells. In parallel, LDHB depletion sensitized both KB and HN12 cells to taxol treatment (Fig 3C and 3D). Cell viability after taxol treatment was remarkably decreased in LDHB-depleted cells compared to the control cells. This observation was recapitulated in a clonogenic assay (Fig 3E). In contrast, the knockdown of LDHB did not affect the potency of either 5-fluorouracil or cisplatin in KB cells (S2 Fig). Meanwhile, no changes in LDH activity or lactate production were detected in both cells following taxol treatment for 12 h, ruling out the possibility of LDHB as a direct target of taxol (S3 Fig). Consistently, LDHB overexpression in HN30 cells, which have low level of endogenous LDHB, decreased the sensitivity of these cells to taxol (Fig 3F). We also examined the

**Table 1. Correlations between LDHB and pathological parameters.**

| Parameter                                 | Low LDHB | High LDHB | P value |
|-------------------------------------------|----------|-----------|---------|
| Age                                       |          |           | 1.0     |
| < 60 years                                | 25       | 28        |         |
| ≥ 60 years                                | 26       | 28        |         |
| Sex                                       |          |           | 0.441   |
| Female                                    | 24       | 22        |         |
| Male                                      | 27       | 34        |         |
| Tumor size                                |          |           | 0.090*  |
| < 2 cm <sup>3</sup>                       | 7        | 8         |         |
| ≥ 2 cm <sup>3</sup> , < 4 cm <sup>3</sup> | 36       | 28        |         |
| ≥ 4 cm <sup>3</sup>                       | 8        | 20        |         |
| TNM classification                        |          |           | 0.079*  |
| I or II                                   | 29       | 23        |         |
| III or IV                                 | 22       | 33        |         |
| Regional metastasis                       |          |           | 0.329   |
| With                                      | 19       | 27        |         |
| Without                                   | 32       | 29        |         |
| Distant metastasis                        |          |           | 0.055   |
| With                                      | 2        | 9         |         |
| Without                                   | 49       | 47        |         |
| Recurrence                                |          |           | 0.011*  |
| With                                      | 6        | 19        |         |
| Without                                   | 45       | 37        |         |
| Histological grading                      |          |           | 0.285   |
| Grade I                                   | 32       | 31        |         |
| Grade II                                  | 17       | 20        |         |
| Grade III                                 | 2        | 5         |         |
| OSCC location                             |          |           | 0.464   |
| Tongue                                    | 23       | 18        |         |
| Buccal                                    | 14       | 15        |         |
| Gingiva                                   | 6        | 14        |         |
| Others (hard palate, mouth floor, etc)    | 8        | 9         |         |

\*Statistically significant difference.

doi:10.1371/journal.pone.0125976.t001

impact of LDHA on cell sensitivity to taxol treatment and found that LDHA depletion did not show any effect on the sensitivity of either KB or HN12 cells to taxol (S4 Fig).

### LDHB depletion enhances taxol-induced G2/M arrest and apoptosis

Taxol is an anti-microtubule agent that inhibits cell growth by arresting cancer cells in mitosis and inducing subsequent apoptosis. To understand how LDHB influences the anticancer effect of taxol, we examined the effect of LDHB on cell cycle progression. LDHB siRNA per se did not affect the cell cycle distribution, whereas the knockdown of LDHB exaggerated taxol-induced G2/M phase arrest in KB and HN12 cells (Fig 4). Taxol (10 nM) alone led to only 15% G2/M phase arrest, whereas the proportion increased to over 40% in LDHB-silenced cells.

We also measured taxol-induced apoptosis. In agreement with the cell-cycle effect, the knockdown of LDHB did not induce apoptosis in either KB or HN12 cells but dramatically



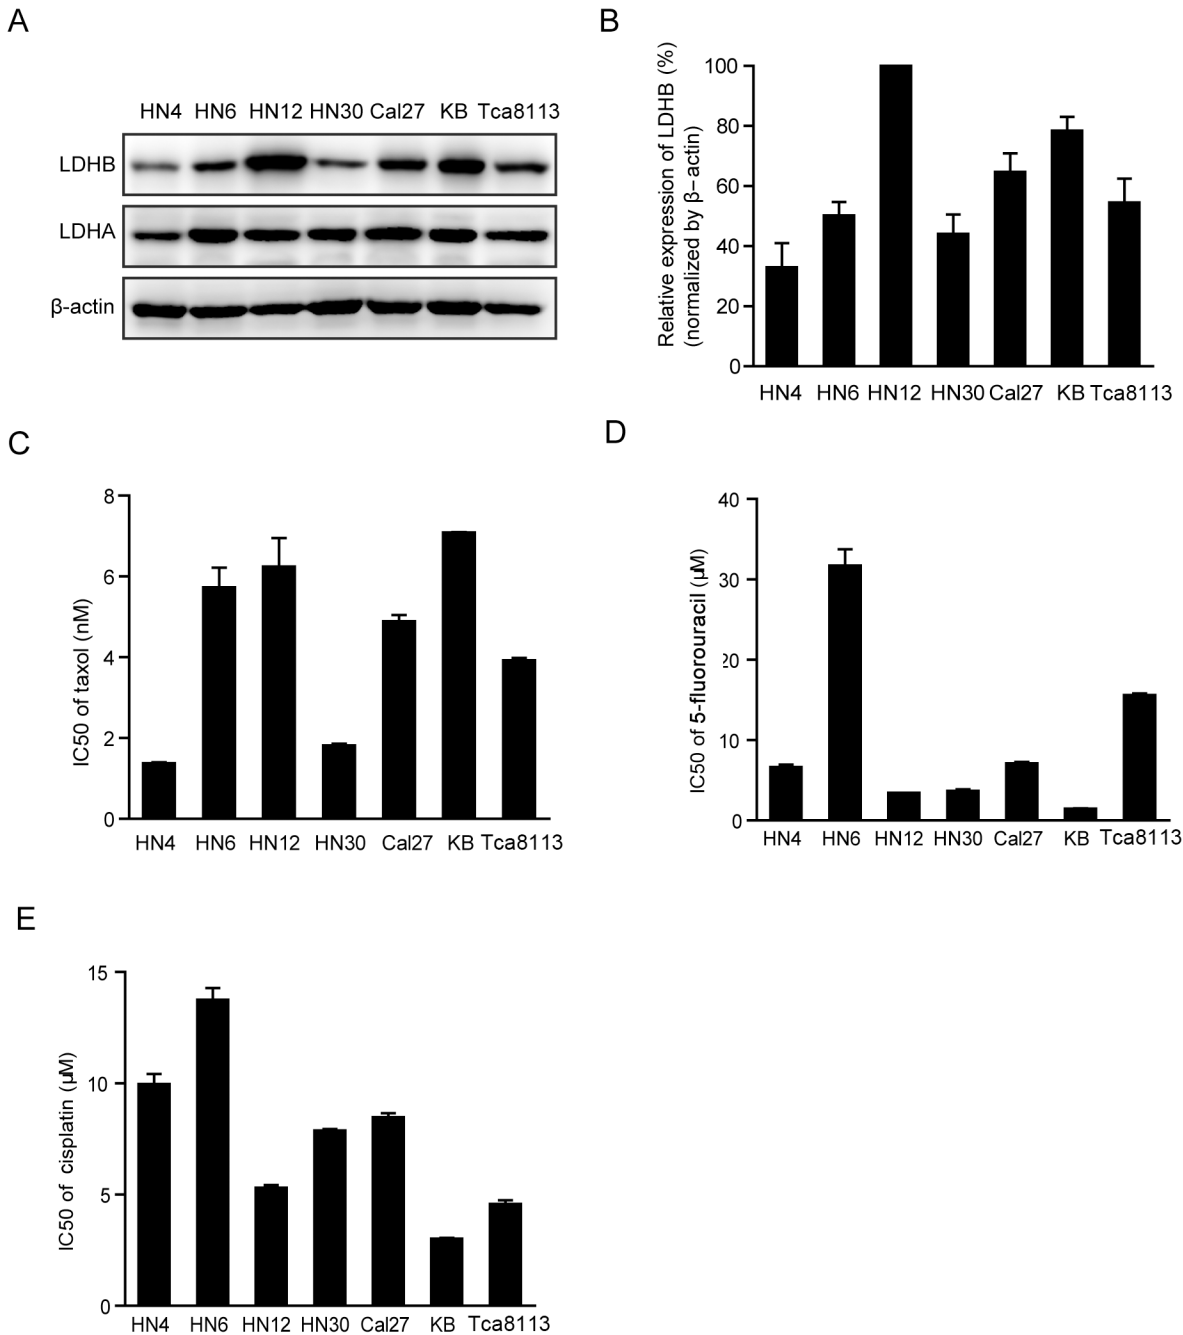

**Fig 2. Correlation between LDHB expression and the cell-inhibitory potency of taxol.** (A) A western blot analysis of LDHA and LDHB in seven OSCC cell lines. (B) The quantification of LDHB relative expression in three independent experiments. (C) The IC<sub>50</sub> value of taxol in seven OSCC cell lines. (D) The IC<sub>50</sub> value of 5-fluorouracil in seven OSCC cell lines. (E) The IC<sub>50</sub> value of cisplatin in seven OSCC cell lines. Mean ± SE (n = 3).

doi:10.1371/journal.pone.0125976.g002

enhanced the taxol-induced apoptotic effect (Fig 5A and 5B). These observations were further supported by the promoted molecular events implicated in apoptosis. Compared to the control cells, the accumulation of cytoplasm cytochrome C was dramatically increased by taxol treatment in LDHB knockdown cells, in line with the reduction of mitochondrial cytochrome C (Fig 6A and 6B). We also observed higher levels of cleaved caspase 3 and caspase 7 and reduced

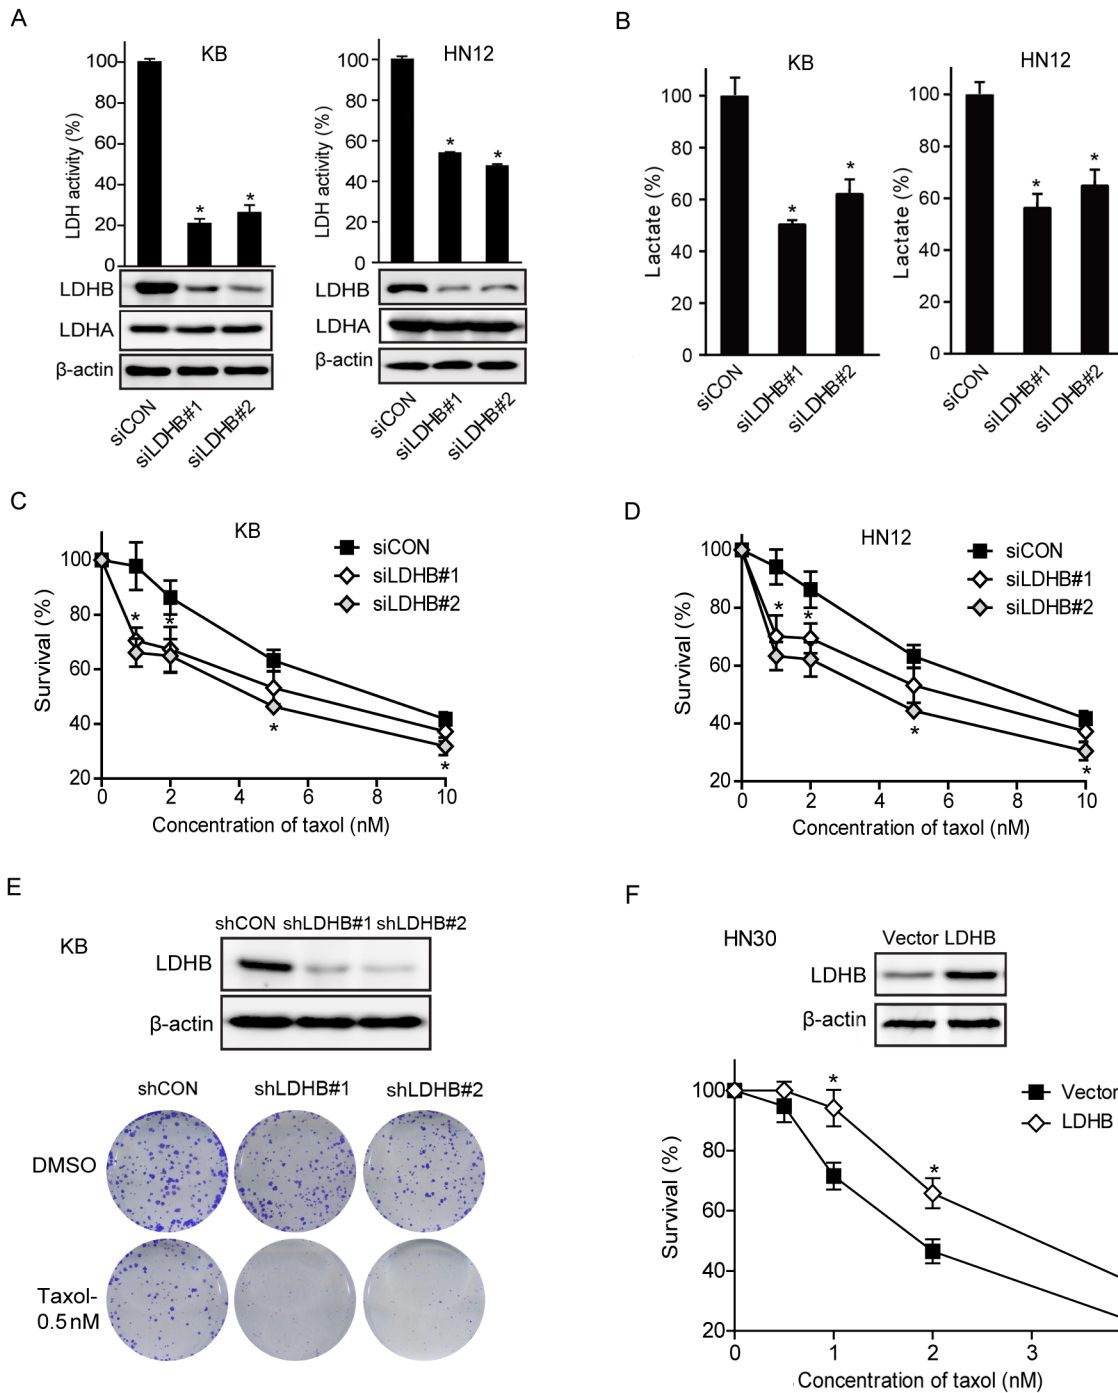

**Fig 3. LDHB impacts the efficacy of taxol.** (A, B) KB and HN12 cells were transfected with scrambled or LDHB siRNA. (A) After 72 h, LDHB expression was examined, and LDH activity was measured. (B) After 48 h, cells were washed with PBS twice followed by the addition of fresh serum-free media and extracellular lactate amount was measured at 12 h post-incubation. (C, D) KB and HN12 cells were transfected with scrambled or LDHB siRNA and then treated with DMSO or taxol for 72 h at the indicated concentrations, and cell viability was measured. (E) The LDHB stable-interference strains of KB cells were established and verified by western blotting; the clonogenic assay was conducted in shCON and shLDHB KB cells exposed to 0.5 nM taxol. (F) HN30 cells were transfected with empty vector or LDHB and treated with DMSO or taxol for 72 h at the indicated concentrations. \* $P < 0.05$ , compared to the control group. Mean  $\pm$  SE (n = 3).

doi:10.1371/journal.pone.0125976.g003

A

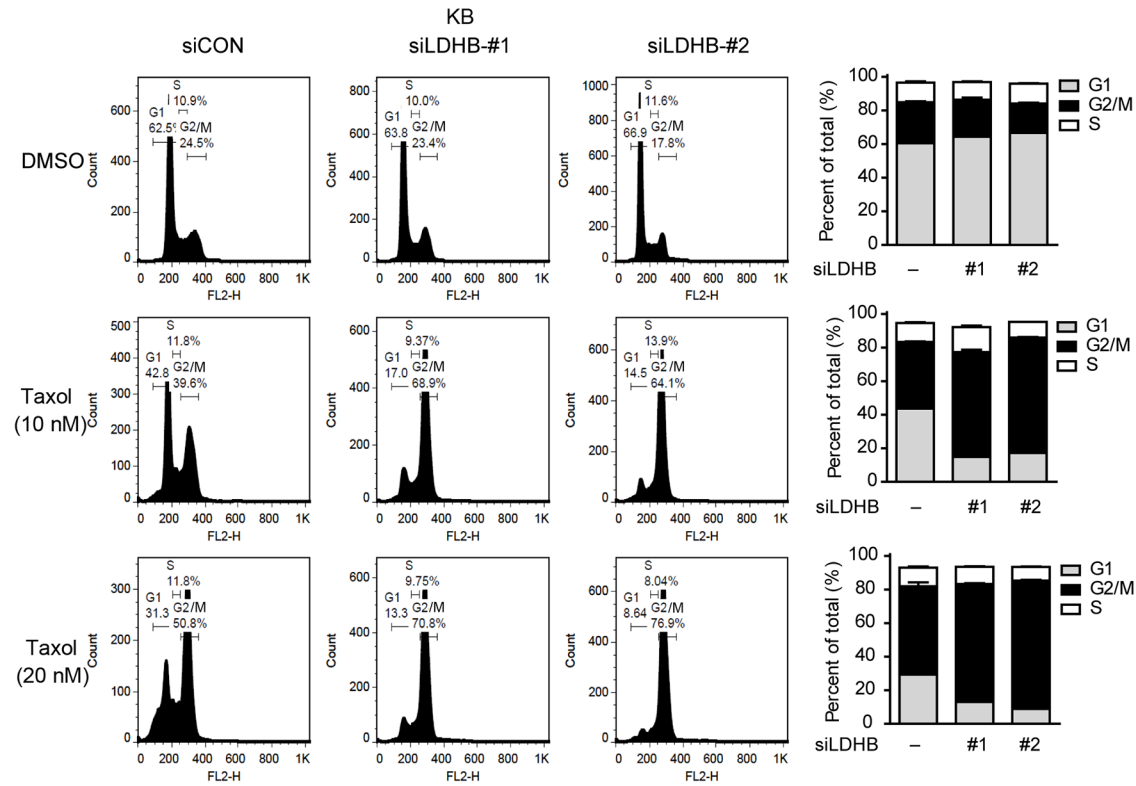

B

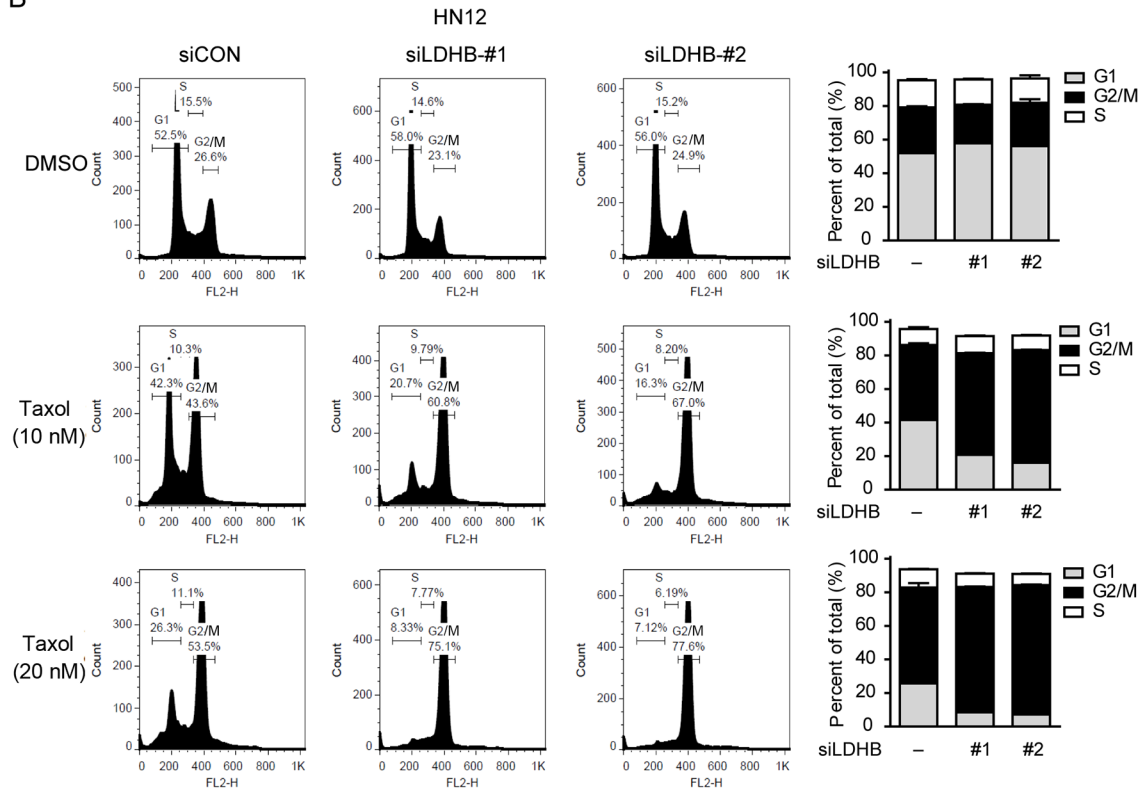

**Fig 4. Silencing LDHB enhances taxol-induced G2/M arrest.** (A, B) KB and HN12 cells were transfected with scrambled or LDHB siRNA and treated with DMSO or taxol for 12 h at the indicated concentrations. The cell cycle was measured by flow cytometry with PI staining. Quantification results from three independent experiments are shown on the right side.

doi:10.1371/journal.pone.0125976.g004

expression of bcl-2 in LDHB knockdown KB cells after exposure to taxol for 24 h (Fig 6C). Consistently, the overexpression of LDHB remarkably reversed the apoptotic effect induced by taxol in HN30 cells (Fig 5C), further supporting that LDHB is a determinant of the cellular impact of taxol.

## LDHB strengthens the effect of taxol on glucose metabolism

OSCC is known as a type of highly hypoxic cancer. It has been extensively reported that hypoxia could desensitize cancer cells to chemotherapeutic drugs [30, 31]. It was thus reasonable to speculate that LDHB might have a role in hypoxia, thus affecting the sensitivity to taxol. However, the expression of HIF-1 $\alpha$ , a well-accepted molecular indicator of hypoxic status [32], seemed unaffected by LDHB interference (S5 Fig), largely excluding the possibility that LDHB modulated the cell sensitivity to taxol via its impact on hypoxia.

The highly hypoxic feature of OSCC may also suggest its unique metabolic profile of glycolytic dependency. This possibility is strengthened by the fact that LDHB is a rate-limiting enzyme of aerobic glycolysis critically catalyzing the conversion of pyruvate into lactate. We then addressed whether metabolic alterations could contribute to the improved therapeutic efficacy of taxol in LDHB-depleted cells. As such, the metabolic alterations were measured by a Seahorse XF 96 Analyzer. ECAR and OCR were measured to indicate the glycolysis rate and the mitochondrial respiration rate respectively. As expected, LDHB depletion significantly decreased ECAR, indicating the reduced glycolysis and consequent lactate production. In the meanwhile, lactate addition failed to compensate the pronounced sensitivity towards taxol caused by LDHB knockdown in both KB and HN12 cells. These results excluded the possibility that lactate per se was involved in the cytotoxicity triggered by taxol (S6 Fig), pointing to a broad impact resulted from glycolysis defects. Indeed, 24-h taxol treatment of LDHB-down-regulated cells remarkably diminished glycolysis and mitochondrial respiration compared with the control cells (Fig 7A–7D). These data were supported by the measurement of ATP production, an outcome of glucose metabolism. The amount of ATP was more significantly reduced by taxol in LDHB-down-regulated cells (Fig 7E and 7F).

These results suggested that metabolic alterations might be involved in the synergistic effect of taxol and LDHB depletion in OSCC cells.

## Discussion

TPF neoadjuvant chemotherapy has exhibited benefits for OSCC patients with a high risk of distant metastasis [4, 5]. However, some studies have shown a limited response in OSCC patients [9]. These controversial reports highlight the importance of discovering a biomarker to define the appropriate subtype of OSCC for TPF neoadjuvant chemotherapy. In this study, we identified LDHB as a metabolic marker for the response to TPF neoadjuvant chemotherapy: patients with high LDHB expression are likely to be resistant to chemotherapy, suggesting that TPF neoadjuvant chemotherapy is suitable for patients with low LDHB expression. Moreover, high expression of LDHB correlated with a remarkable reduction in overall survival and disease-free survival, whereas low expression of LDHB correlated with favorable overall survival and disease-free survival over 6 years of follow-up. The lack of response to chemotherapy might partially contribute to the observed compromised overall survival and disease-free

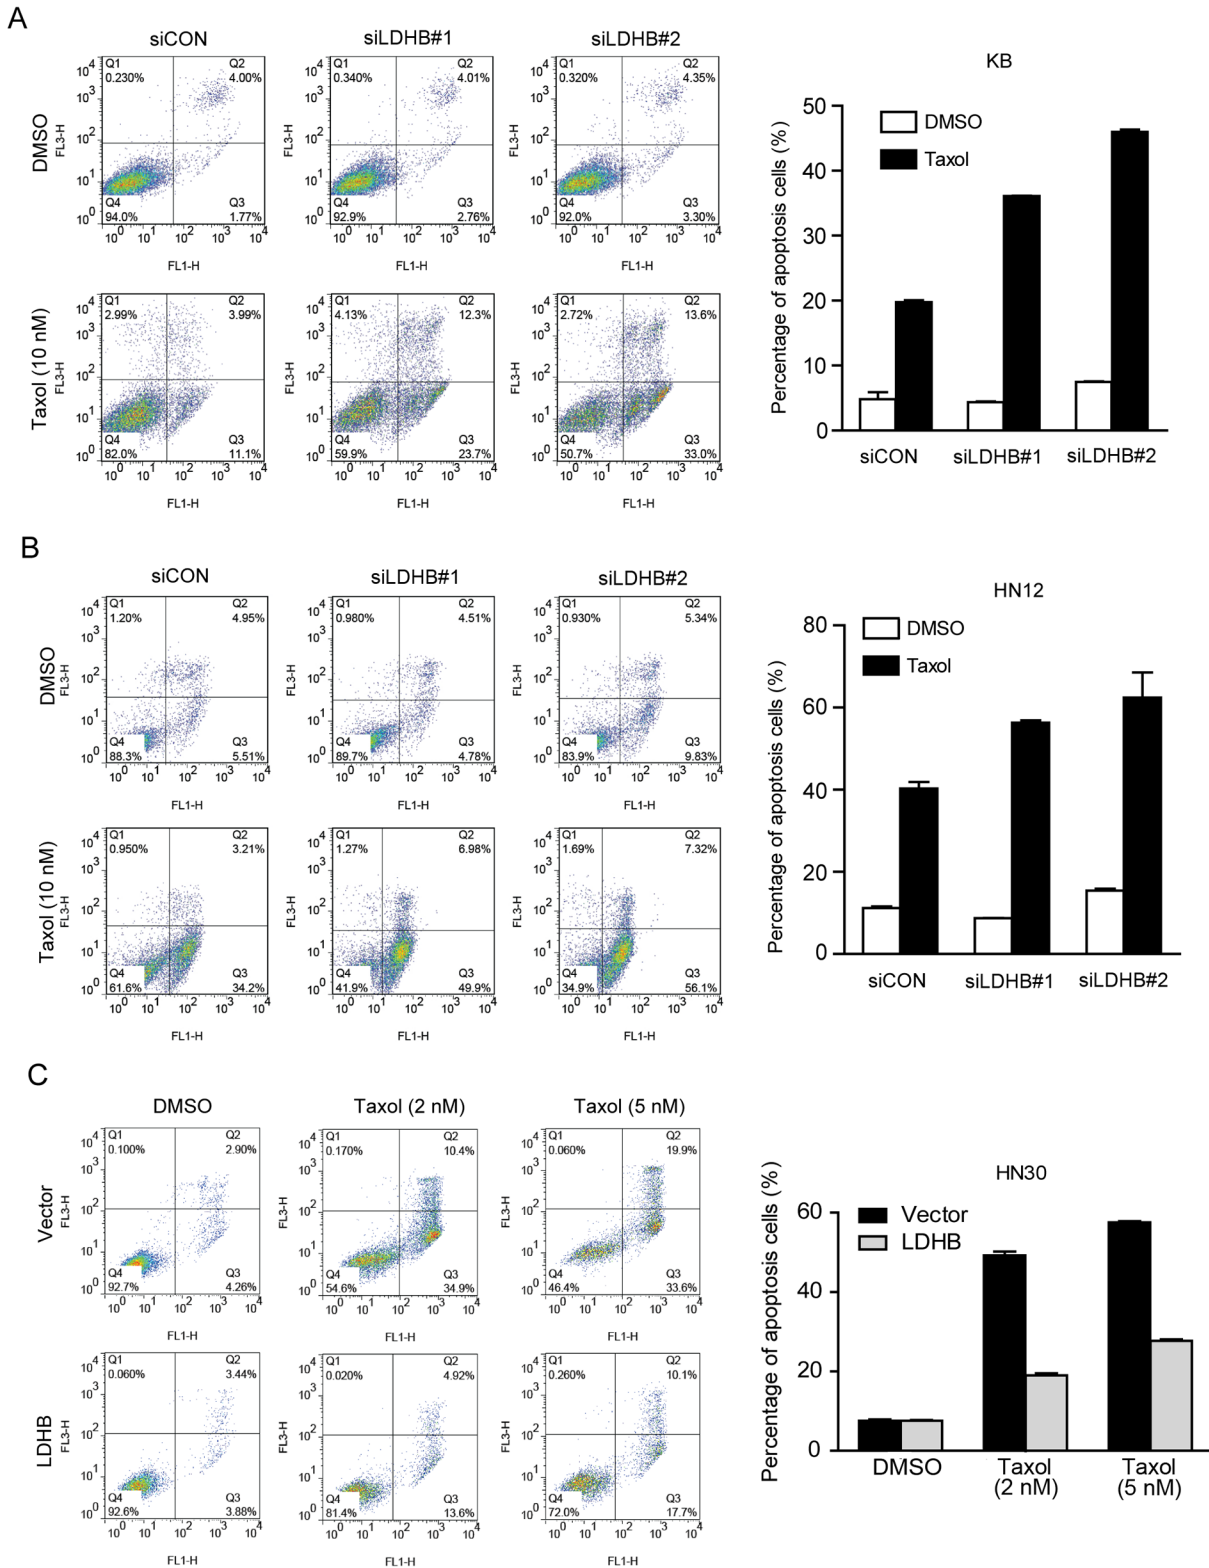

**Fig 5. Knockdown of LDHB enhances taxol-induced apoptosis.** (A, B) KB cells and HN12 cells were transfected with scrambled or LDHB siRNA and treated with DMSO or 10 nM taxol for 48 h. (C) HN30 cells were transfected with empty vector or LDHB and treated with DMSO or taxol for 48 h at the indicated concentrations. Quantification results of three independent experiments are shown on the right side.

doi:10.1371/journal.pone.0125976.g005

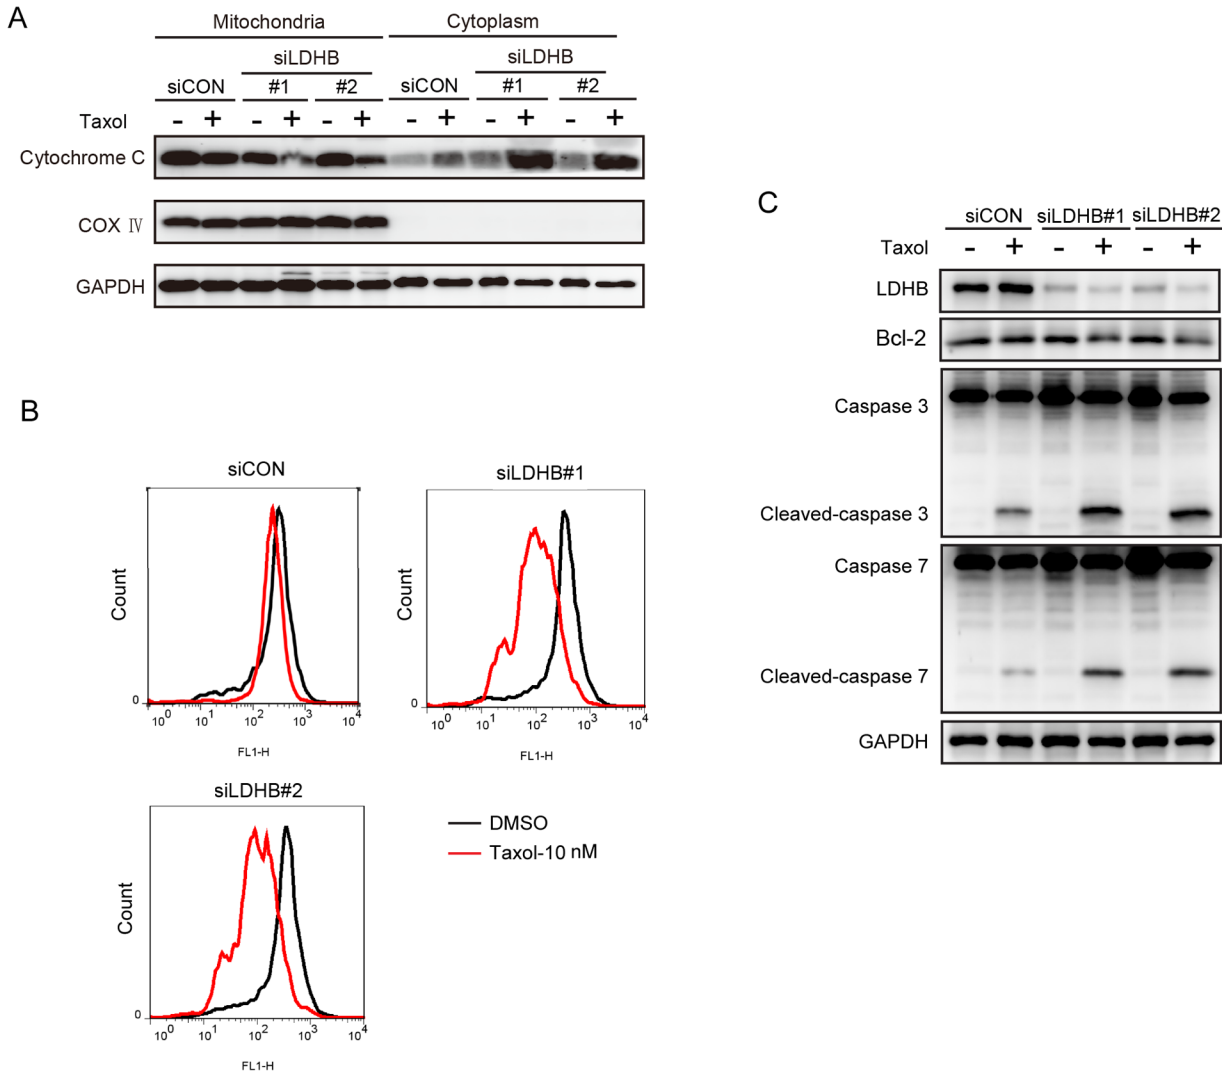

**Fig 6. Knockdown of LDHB induces the mitochondrion-dependent apoptosis pathway.** KB cells were transfected with scrambled or LDHB siRNA and then treated with DMSO or 10 nM taxol for 24 h. (A) The mitochondria and the cytoplasm were separated and measured for cytochrome C by western blotting. COX IV was used as a marker for mitochondria. (B) Mitochondrial cytochrome C was measured by FACS analysis. (C) Cell lysates were prepared for western blotting. GAPDH was used as a loading control.

doi:10.1371/journal.pone.0125976.g006

survival. This study highlights LDHB as a biomarker for neoadjuvant chemotherapy and prognosis in OSCC patients, which is of great significance for future medical applications.

We also attempted to investigate how LDHB influenced the response to TPF neoadjuvant chemotherapy among OSCC patients. By comparing the expression of LDHB and LDHA in a panel of OSCC cell lines, we observed that LDHB expression varied among these cell lines, though LDHA displayed similar expression levels. Intriguingly, the expression of LDHB was associated with sensitivity to taxol but not cisplatin or 5-fluorouracil, indicating that variable sensitivity to taxol might account for the observed differential response to TPF treatment. To explore this possibility, we depleted LDHB in KB and HN12 cells, which have a high level of basal expression, and observed that the down-regulation of LDHB but not LDHA enhanced sensitivity to taxol. Consistently, the introduction of LDHB decreased sensitivity to taxol. It has previously been reported that the expression and activity of LDHA were increased in taxol-

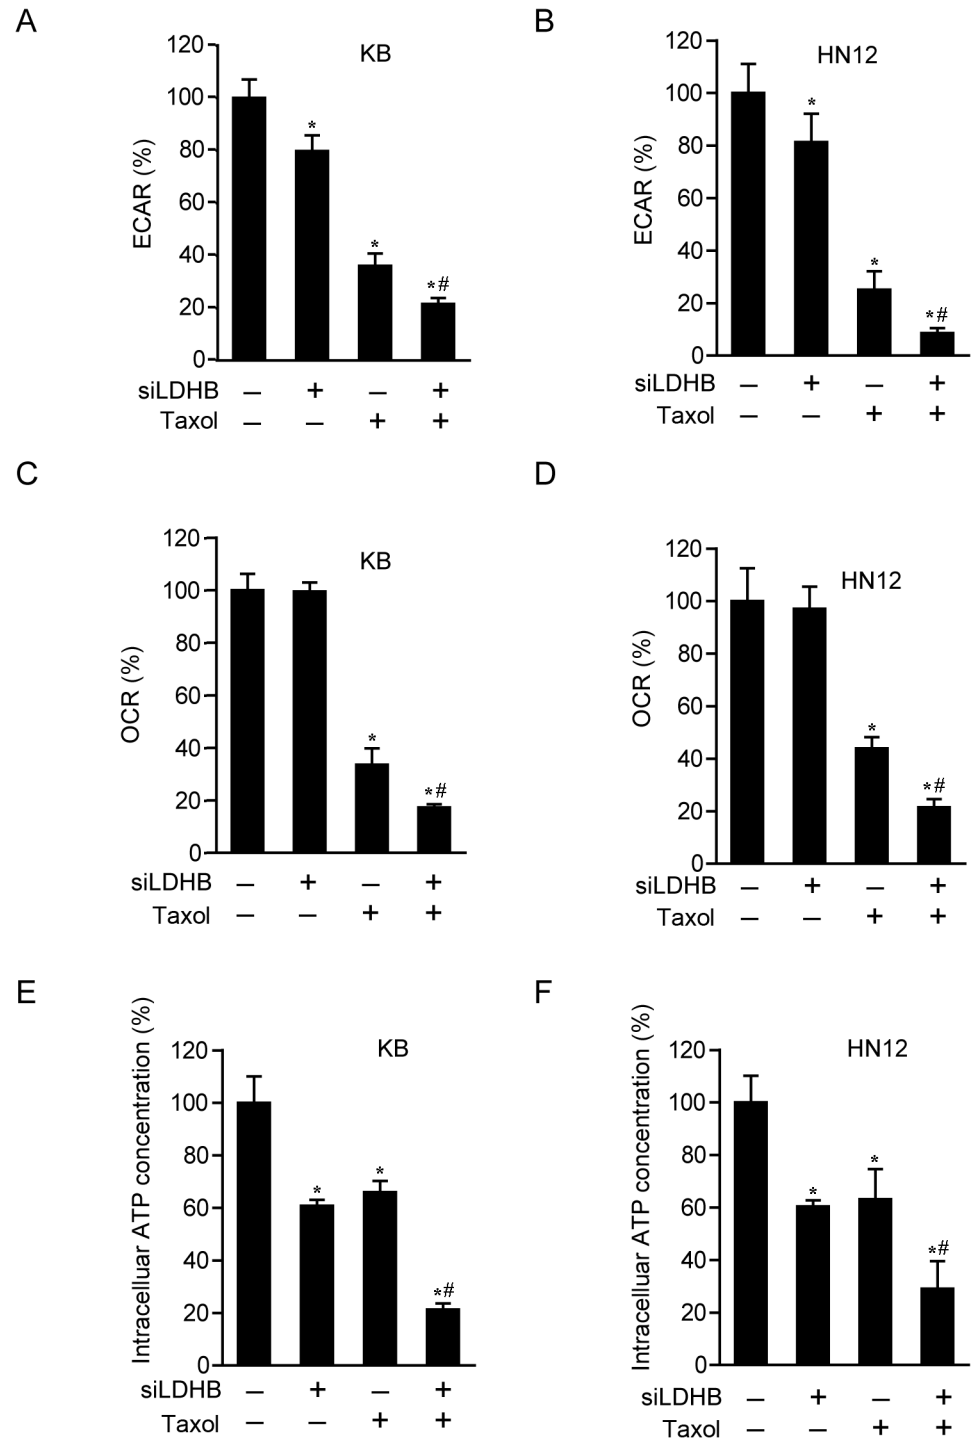

**Fig 7. Combination of taxol and LDHB down-regulation exhibits a synergistic effect on cell metabolism.** KB and HN12 cells were transfected with scramble or LDHB siRNA and then treated with DMSO or taxol of 10 nM for 24 h. (A, B) ECAR was measured by an XF96 analyzer. (C, D) OCR was measured by an XF96 analyzer. (E, F) Cell lysates were prepared, and the intracellular ATP level was determined. \* $P < 0.05$ , compared to the control group; # $P < 0.05$ , compared to the taxol group. Mean  $\pm$  SE (n = 3).

doi:10.1371/journal.pone.0125976.g007

resistant MDA-MB-435 breast cancer cell lines and that the down-regulation of LDHA significantly increased sensitivity to taxol [9]. These results suggested that the role of LDHA and LDHB in conferring drug resistance to chemotherapy possibly varied among cell contexts.

Interestingly, LDHB is generally believed to favor the conversion of lactate into pyruvate, while LDHA preferentially converts pyruvate into lactate. However, this does not always appear to be the case. LDHB is associated with glycolytic phenotypes in triple-negative breast cancer [24, 25] and KRAS-dependent lung adenocarcinomas [23], in which LDHB is the predominant form for glycolysis. Our results also suggested that LDHB was the predominant form in OSCC, as the knockdown of LDHB greatly reduced the conversion of pyruvate into lactate in both KB and HN12 cells. Nonetheless, it remains unclear how LDHB inhibition causes a dramatic decrease in the conversion of pyruvate to lactate, which raises an important question about the biochemical activity of the LDHB isoform. Because LDHB and LDHA are known to form tetramers and affect each other, it is possible that the down-regulation of LDHB somehow affects LDHA activity and the forward reaction. An alternative explanation is that the LDHB function opposes that of LDHA or directs LDHA function within the context of OSCC [25]. Our data extend these initial observations and implicate LDHB as a metabolic regulator in OSCC. Accordingly, it would be of interest to determine the upstream pathways that regulate LDHB expression in OSCC.

Another intriguing finding is that LDHB specifically affected sensitivity of cancer cells to taxol but not to either cisplatin or 5-fluorouracil. Taxol is well known for targeting microtubules by stabilizing their structure, which is vital for mitotic activity and cellular motility. Taxol is also a potent inhibitor of chromosomal replication by blocking cells in G2/M phase [33]. There are several mechanisms involved in taxol resistance, including high expression of membrane P-glycoprotein, drug efflux pumps, the alteration of microtubule structure, drug-binding affinity and cell cycle deregulation [34–38]. Our results indicated that LDHB was a relevant metabolic marker contributing to taxol resistance. How is glycolysis mechanistically involved in the modulation of cell sensitivity to taxol remains unclear. One possible assumption is that impaired lactate production might account for the increased sensitivity to taxol. However, the addition of lactate could not compensate the proliferative suppression elicited by taxol in LDHB knockdown cells, largely ruling out this possibility. It appeared to us that in OSCC cells with high LDHB expression, the metabolic suppression caused by LDHB depletion endowed cells with susceptibility to stresses, like taxol treatment. For example, one of contributors could be the reduction in ATP levels, which not only affected the biological status of cancer cells but also impeded the efflux of taxol, leading to the intracellular accumulation of taxol.

## Conclusions

In summary, we observed that LDHB expression was associated with poor overall survival and disease-free survival in patients with OSCC. Importantly, high LDHB expression was correlated with a reduced response to TPF neoadjuvant chemotherapy. LDHB but not LDHA was related to taxol sensitivity, demonstrating that the former played a predominant role in the cellular sensitivity to this drug. Furthermore, the combination of LDHB down-regulation and taxol induced pronounced effects on cell apoptosis, G2/M phase arrest and energy metabolism. This study highlighted the critical role of LDHB in OSCC and proposes that LDHB could be used as a biomarker for the selection of patients for TPF neoadjuvant chemotherapy and the prediction of OSCC prognosis.



## Supporting Information

**S1 Fig. The impact of LDHB knockdown on the cell proliferation varies among seven OSCC cell lines.** Seven OSCC cells were transfected with scrambled or LDHB siRNA and cell viability was measured at 24, 48 and 72 h post-transfection, respectively. The interfering efficiency of LDHB was measured by western blotting. Mean  $\pm$  SE (n = 3).

(TIF)

**S2 Fig. Knockdown of LDHB has no influence on the antitumor effect of cisplatin and 5-fluorouracil.** KB cells were transfected with scrambled or LDHB siRNA and then treated with DMSO or cisplatin/5-fluorouracil for 72 h at the indicated concentrations. Cell survival was examined by SRB. Mean  $\pm$  SE (n = 3).

(TIF)

**S3 Fig. Taxol treatment for 12 h does not affect the LDH activity or lactate production.** KB and HN12 cells were treated with taxol at the indicated concentrations. After 12 h, LDH activity and lactate amount were measured. Mean  $\pm$  SE (n = 3).

(TIF)

**S4 Fig. Knockdown of LDHA has no influence on the antitumor effect of taxol.** KB and HN12 cells were transfected with scrambled or LDHA siRNA and then treated with DMSO or taxol for 72 h at the indicated concentrations. Cell survival was examined by CCK8. Mean  $\pm$  SE (n = 3).

(TIF)

**S5 Fig. LDHB knockdown did not affect the level of HIF-1 $\alpha$ .** The efficiency of LDHB knockdown was verified by western blotting, followed by the detection of the expression of Hif-1 $\alpha$ .

(TIF)

**S6 Fig. The addition of lactate to LDHB knockdown cell culture medium could not compensate the effect of LDHB knockdown.** KB and HN12 cells were transfected with scrambled or LDHB siRNA and cell sensitivity was measured in the presence or absence of 2 mM lactate. Cell viability was measured using CCK8 assay following 72-h exposure to vehicle or taxol treatment. Mean  $\pm$  SE (n = 3).

(TIF)

**S7 Fig. Original unadjusted blots.**

(TIF)

## Acknowledgments

This work was supported by the National Natural Science Foundation of China (No. 81222049, No. 81202549), the National Science and Technology Major Project of the Ministry of Science and Technology of China (No. 2012ZX09301001-004, No.2012ZX09301001-007) and the Pujiang Scholar Program Grant by the Shanghai Metropolitan Government (No. 12PJ1410400).

## Author Contributions

Conceived and designed the experiments: MH HMW WYS ZQX MYG. Performed the experiments: WYS XMZ XD HQL. Analyzed the data: WYS ZQX HMW. Contributed reagents/materials/analysis tools: WYS. Wrote the paper: MH ZQX WYS.

## References

1. Parkin DM, Bray F, Ferlay J, Pisani P. Global cancer statistics, 2002. *CA Cancer J Clin.* 2005; 55:74–108. PMID: [15761078](#)
2. Leemans CR, Braakhuis BJ, Brakenhoff RH. The molecular biology of head and neck cancer. *Nat Rev Cancer.* 2011; 11:9–22. doi: [10.1038/nrc2982](#) PMID: [21160525](#)
3. Lothaire P, de Azambuja E, Dequanter D, Lalami Y, Sotiriou C, Andry G, et al. Molecular markers of head and neck squamous cell carcinoma: promising signs in need of prospective evaluation. *Head Neck.* 2006; 28:256–269. PMID: [16284973](#)
4. Lorch JH, Goloubeva O, Haddad RI, Cullen K, Sarlis N, Tishler R, et al. Induction chemotherapy with cisplatin and fluorouracil alone or in combination with docetaxel in locally advanced squamous-cell cancer of the head and neck: long-term results of the TAX 324 randomised phase 3 trial. *Lancet Oncol.* 2011; 12:153–159. doi: [10.1016/S1470-2045\(10\)70279-5](#) PMID: [21233014](#)
5. Vermorken JB, Remenar E, van Herpen C, Gorlia T, Mesia R, Degardin M, et al. Cisplatin, fluorouracil, and docetaxel in unresectable head and neck cancer. *N Eng J Med.* 2007; 357:1695–1704. PMID: [17960012](#)
6. Posner MR, Hershock DM, Blajman CR, Mickiewicz E, Winkvist E, Gorbounova V, et al. Cisplatin and fluorouracil alone or with docetaxel in head and neck cancer. *N Eng J Med.* 2007; 357:1705–1715. PMID: [17960013](#)
7. Hitt R, Lopez-Pousa A, Martinez-Trufero J, Escrig V, Carles J, Rizo A, et al. Phase III study comparing cisplatin plus fluorouracil to paclitaxel, cisplatin, and fluorouracil induction chemotherapy followed by chemoradiotherapy in locally advanced head and neck cancer. *J Clin Oncol.* 2005; 23:8636–8645. PMID: [16275937](#)
8. Zhong LP, Zhang CP, Ren GX, Guo W, William WN Jr., Sun J, et al. Randomized phase III trial of induction chemotherapy with docetaxel, cisplatin, and fluorouracil followed by surgery versus up-front surgery in locally advanced resectable oral squamous cell carcinoma. *J Clin Oncol.* 2013; 31:744–751. doi: [10.1200/JCO.2012.43.8820](#) PMID: [23129742](#)
9. Ma J, Liu Y, Huang XL, Zhang ZY, Myers JN, Neskey DM, et al. Induction chemotherapy decreases the rate of distant metastasis in patients with head and neck squamous cell carcinoma but does not improve survival or locoregional control: a meta-analysis. *Oral Oncol.* 2012; 48:1076–1084. doi: [10.1016/j.oraloncology.2012.06.014](#) PMID: [22800881](#)
10. Vander Heiden MG, Cantley LC, Thompson CB. Understanding the Warburg effect: the metabolic requirements of cell proliferation. *Science.* 2009; 324:1029–1033. doi: [10.1126/science.1160809](#) PMID: [19460998](#)
11. Draoui N, Feron O. Lactate shuttles at a glance: from physiological paradigms to anti-cancer treatments. *Dis Model Mech.* 2011; 4:727–732. doi: [10.1242/dmm.007724](#) PMID: [22065843](#)
12. Kayser G, Kassem A, Siemel W, Schulte-Uentrop L, Mattern D, Aumann K, et al. Lactate dehydrogenase 5 is overexpressed in non-small cell lung cancer and correlates with the expression of the transketolase-like protein 1. *Diagn Pathol.* 2010; 5:22. doi: [10.1186/1746-1596-5-22](#) PMID: [20385008](#)
13. Kolev Y, Uetake H, Takagi Y, Sugihara K. Lactate dehydrogenase-5 (LDH-5) expression in human gastric cancer: association with hypoxia-inducible factor (HIF-1 $\alpha$ ) pathway, angiogenic factors production and poor prognosis. *Ann Surg Oncol.* 2008; 15:2336–2344. doi: [10.1245/s10434-008-9955-5](#) PMID: [18521687](#)
14. Koukourakis MI, Giatromanolaki A, Sivridis E, Gatter KC, Harris AL. Lactate dehydrogenase 5 expression in operable colorectal cancer: strong association with survival and activated vascular endothelial growth factor pathway—a report of the Tumour Angiogenesis Research Group. *J Clin Oncol.* 2006; 24:4301–4308. PMID: [16896001](#)
15. Koukourakis MI, Giatromanolaki A, Sivridis E, Bougioukas G, Didilis V, Gatter KC, et al. Lactate dehydrogenase-5 (LDH-5) overexpression in non-small-cell lung cancer tissues is linked to tumour hypoxia, angiogenic factor production and poor prognosis. *Br J Cancer.* 2003; 89:877–885. PMID: [12942121](#)
16. Fantin VR, St-Pierre J, Leder P. Attenuation of LDH-A expression uncovers a link between glycolysis, mitochondrial physiology, and tumor maintenance. *Cancer Cell.* 2006; 9:425–434. PMID: [16766262](#)
17. Le A, Cooper CR, Gouw AM, Dinavahi R, Maitra A, Deck LM, et al. Inhibition of lactate dehydrogenase A induces oxidative stress and inhibits tumor progression. *Proc Natl Acad Sci U S A.* 2010; 107:2037–2042. doi: [10.1073/pnas.0914433107](#) PMID: [20133848](#)
18. Shim H, Dolde C, Lewis BC, Wu CS, Dang G, Jungmann RA, et al. c-Myc transactivation of LDH-A: implications for tumor metabolism and growth. *Proc Natl Acad Sci U S A.* 1997; 94:6658–6663. PMID: [9192621](#)
19. Firth JD, Ebert BL, Ratcliffe PJ. Hypoxic regulation of lactate dehydrogenase A. Interaction between hypoxia-inducible factor 1 and cAMP response elements. *J Biol Chem.* 1995; 270:21021–21027. PMID: [7673128](#)

20. Fan J, Hitosugi T, Chung TW, Xie J, Ge Q, Gu TL, et al. Tyrosine phosphorylation of lactate dehydrogenase A is important for NADH/NAD(+) redox homeostasis in cancer cells. *Mol Cell Biol.* 2011; 31:4938–4950. doi: [10.1128/MCB.06120-11](https://doi.org/10.1128/MCB.06120-11) PMID: [21969607](https://pubmed.ncbi.nlm.nih.gov/21969607/)
21. Wang ZY, Loo TY, Shen JG, Wang N, Wang DM, Yang DP, et al. LDH-A silencing suppresses breast cancer tumorigenicity through induction of oxidative stress mediated mitochondrial pathway apoptosis. *Breast Cancer Res Treat.* 2012; 131:791–800. doi: [10.1007/s10549-011-1466-6](https://doi.org/10.1007/s10549-011-1466-6) PMID: [21452021](https://pubmed.ncbi.nlm.nih.gov/21452021/)
22. Xie H, Valera VA, Merino MJ, Amato AM, Signoretti S, Linehan WM, et al. LDH-A inhibition, a therapeutic strategy for treatment of hereditary leiomyomatosis and renal cell cancer. *Mol Cancer Ther.* 2009; 8:626–635. doi: [10.1158/1535-7163.MCT-08-1049](https://doi.org/10.1158/1535-7163.MCT-08-1049) PMID: [19276158](https://pubmed.ncbi.nlm.nih.gov/19276158/)
23. McClelland ML, Adler AS, Deming L, Cosino E, Lee L, Blackwood EM, et al. Lactate dehydrogenase B is required for the growth of kras-dependent lung adenocarcinomas. *Clin Cancer Res.* 2012; 19:773–784. doi: [10.1158/1078-0432.CCR-12-2638](https://doi.org/10.1158/1078-0432.CCR-12-2638) PMID: [23224736](https://pubmed.ncbi.nlm.nih.gov/23224736/)
24. McClelland ML, Adler AS, Shang Y, Hunsaker T, Truong T, Peterson D, et al. An integrated genomic screen identifies LDHB as an essential gene for triple-negative breast cancer. *Cancer Res.* 2012; 72:5812–5823. doi: [10.1158/0008-5472.CAN-12-1098](https://doi.org/10.1158/0008-5472.CAN-12-1098) PMID: [23139210](https://pubmed.ncbi.nlm.nih.gov/23139210/)
25. Dennison JB, Molina JR, Mitra S, Gonzalez-Angulo AM, Balko JM, Kuba MG, et al. Lactate dehydrogenase B: a metabolic marker of response to neoadjuvant chemotherapy in breast cancer. *Clin Cancer Res.* 2013; 19:3703–3713. doi: [10.1158/1078-0432.CCR-13-0623](https://doi.org/10.1158/1078-0432.CCR-13-0623) PMID: [23697991](https://pubmed.ncbi.nlm.nih.gov/23697991/)
26. Cardinali M, Pietraszkiewicz H, Ensley JF, Robbins KC. Tyrosine phosphorylation as a marker for aberrantly regulated growth-promoting pathways in cell-lines derived from head and neck malignancies. *Int J Cancer.* 1995; 61:98–103. PMID: [7705939](https://pubmed.ncbi.nlm.nih.gov/7705939/)
27. Sansing HA, Sarkeshik A, Yates JR, Patel V, Gutkind JS, Yamada KM, et al. Integrin alpha beta 1, alpha(v)beta, alpha(6)beta effectors p130Cas, Src and talin regulate carcinoma invasion and chemoresistance. *Biochem Biophys Res Commun.* 2011; 406:171–176. doi: [10.1016/j.bbrc.2011.01.109](https://doi.org/10.1016/j.bbrc.2011.01.109) PMID: [21291860](https://pubmed.ncbi.nlm.nih.gov/21291860/)
28. Campos MS, Rodini CO, Pinto-Junior DS, Nunes FD. GAPD and tubulin are suitable internal controls for qPCR analysis of oral squamous cell carcinoma cell lines. *Oral Oncol.* 2009; 45:121–126. doi: [10.1016/j.oraloncology.2008.03.019](https://doi.org/10.1016/j.oraloncology.2008.03.019) PMID: [18621570](https://pubmed.ncbi.nlm.nih.gov/18621570/)
29. Patel V, Martin D, Malhotra R, Marsh CA, Doci CL, Veenstra TD, et al. DSG3 as a biomarker for the ultrasensitive detection of occult lymph node metastasis in oral cancer using nanostructured immunorays. *Oral Oncol.* 2013; 49:93–101. doi: [10.1016/j.oraloncology.2012.08.001](https://doi.org/10.1016/j.oraloncology.2012.08.001) PMID: [23010602](https://pubmed.ncbi.nlm.nih.gov/23010602/)
30. Xu RH, Pelicano H, Zhou Y, Carew JS, Feng L, Bhalla KN, et al. Inhibition of glycolysis in cancer cells: a novel strategy to overcome drug resistance associated with mitochondrial respiratory defect and hypoxia. *Cancer Res.* 2005; 65:613–621. PMID: [15695406](https://pubmed.ncbi.nlm.nih.gov/15695406/)
31. Milane L, Duan Z, Amiji M. Role of hypoxia and glycolysis in the development of multi-drug resistance in human tumor cells and the establishment of an orthotopic multi-drug resistant tumor model in nude mice using hypoxic pre-conditioning. *Cancer Cell Int.* 2011; 11.
32. Wang GL, Jiang BH, Rue EA, Semenza GL. Hypoxia-inducible factor-1 is a basic-helix-loop-helix-pas heterodimer regulated by cellular O<sub>2</sub> tension. *Proc Natl Acad Sci U S A.* 1995; 92:5510–5514. PMID: [7539918](https://pubmed.ncbi.nlm.nih.gov/7539918/)
33. Frankel A, Buckman R, Kerbel RS. Abrogation of taxol-induced G2-M arrest and apoptosis in human ovarian cancer cells grown as multicellular tumor spheroids. *Cancer Res.* 1997; 57:2388–2393. PMID: [9192815](https://pubmed.ncbi.nlm.nih.gov/9192815/)
34. Kavallaris M, Kuo DY, Burkhart CA, Regl DL, Norris MD, Haber M, et al. Taxol-resistant epithelial ovarian tumors are associated with altered expression of specific beta-tubulin isoforms. *J Clin Invest.* 1997; 100:1282–1293. PMID: [9276747](https://pubmed.ncbi.nlm.nih.gov/9276747/)
35. Martello LA, Verdier-Pinard P, Shen HJ, He L, Torres K, Orr GA, et al. Elevated levels of microtubule destabilizing factors in a taxol-resistant/dependent A549 cell line with an alpha-tubulin mutation. *Cancer Res.* 2003; 63:1207–1213. PMID: [12649178](https://pubmed.ncbi.nlm.nih.gov/12649178/)
36. Goncalves A, Braguer D, Kamath K, Martello L, Briand C, Horwitz S, et al. Resistance to taxol in lung cancer cells associated with increased microtubule dynamics. *Proc Natl Acad Sci U S A.* 2001; 98:11737–11742. PMID: [11562465](https://pubmed.ncbi.nlm.nih.gov/11562465/)
37. Tan M, Jing T, Lan KH, Neal CL, Li P, Lee S, et al. Phosphorylation on tyrosine-15 of p34(Cdc2) by ErbB2 inhibits p34(Cdc2) activation and is involved in resistance to taxol-induced apoptosis. *Mol Cell.* 2002; 9:993–1004. PMID: [12049736](https://pubmed.ncbi.nlm.nih.gov/12049736/)
38. Lu J, Tan M, Huang WC, Li P, Guo H, Tseng LM, et al. Mitotic deregulation by survivin in ErbB2-overexpressing breast cancer cells contributes to taxol resistance. *Clin Cancer Res.* 2009; 15:1326–1334. doi: [10.1158/1078-0432.CCR-08-0954](https://doi.org/10.1158/1078-0432.CCR-08-0954) PMID: [19228734](https://pubmed.ncbi.nlm.nih.gov/19228734/)
